CORRECTION

# Correction: Bubble-Induced Cave Collapse

Lakshika Girihagama, Doron Nof, Cathrine Hancock

The following information is missing from the Funding section: This study was supported by the Geophysical Fluid Dynamics Institute (GFDI) (Contribution Number 470). Both LG and CH were partially supported by GFDI.

## Reference

1. Girihagama L, Nof D, Hancock C (2015) Bubble-Induced Cave Collapse. PLoS ONE 10(4): e0122349. doi: [10.1371/journal.pone.0122349](https://doi.org/10.1371/journal.pone.0122349) PMID: [25849088](https://pubmed.ncbi.nlm.nih.gov/25849088/)

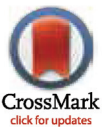

## OPEN ACCESS

**Citation:** Girihagama L, Nof D, Hancock C (2015) Correction: Bubble-Induced Cave Collapse. PLoS ONE 10(5): e0127829. doi:10.1371/journal.pone.0127829

**Published:** May 1, 2015

**Copyright:** © 2015 Girihagama et al. This is an open access article distributed under the terms of the [Creative Commons Attribution License](https://creativecommons.org/licenses/by/4.0/), which permits unrestricted use, distribution, and reproduction in any medium, provided the original author and source are credited.
